# Supplementary material for: Broad spectral response of an individual tellurium nanobelt grown by molecular beam epitaxy
Source: Royal Society of Chemistry journal article supplement (doi:10.1039/c8nr07978a), 2018-12-24
Supplement: c8nr07978a1.pdf [file c8nr07978a1.pdf]

## Supplementary Information

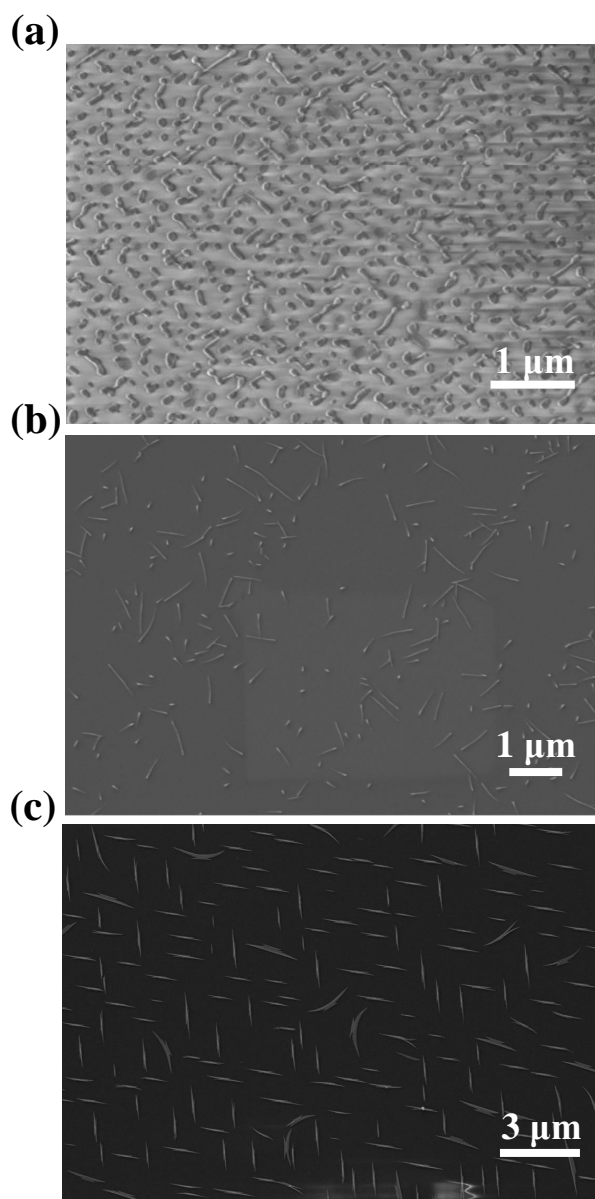

**Fig. S1** SEM images of Te grown on different substrates such as LaAlO<sub>3</sub> (a), SiO<sub>2</sub> (b), and Mica (c).

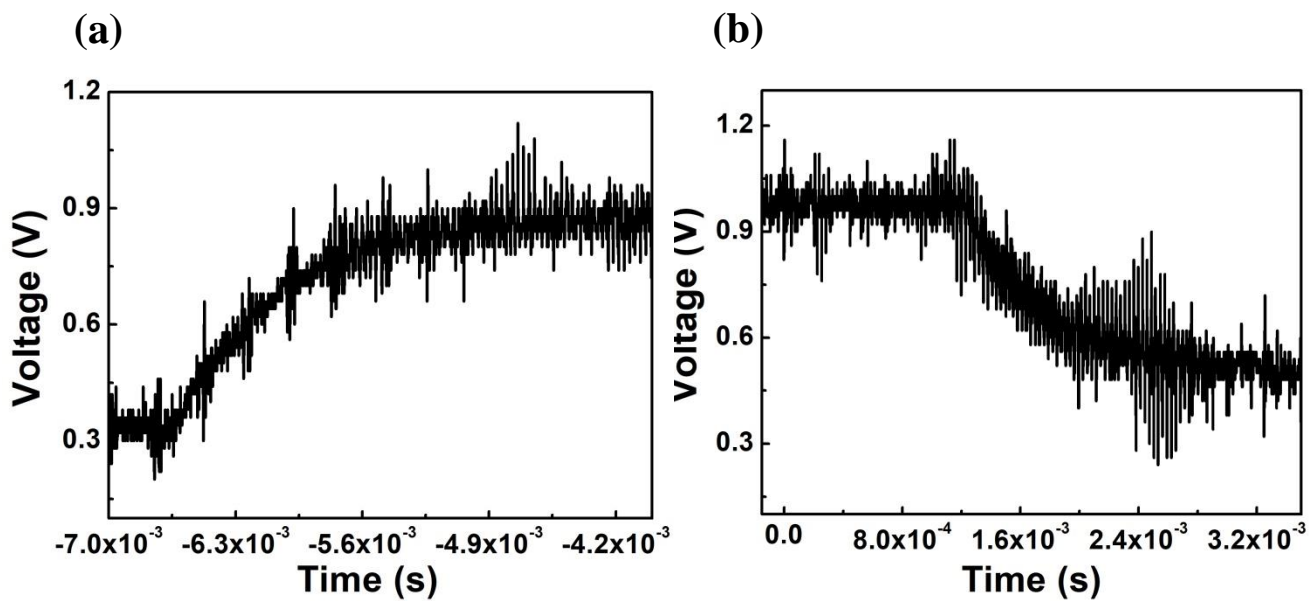

**Fig. S2** The rise (a) and decay time (b) measured by the voltage change through oscilloscope.
